1 **Genome-wide study identifies association between HLA-B\*55:01 and penicillin**  
2 **allergy**

3  
4 Kristi Krebs, M.S.,<sup>1,2\*</sup>, Jonas Bovijn, M.D.,<sup>3,4\*</sup>, Maarja Lepamets, M.S.,<sup>1,2</sup>, Jenny C  
5 Censin, M.D.,<sup>3,4</sup>, Tuuli Jürgenson, B.S.,<sup>5</sup>, Dage Särg, M.S.,<sup>6</sup>, Yang Luo, Ph.D.,<sup>7-11</sup>,  
6 Line Skotte, Ph.D.<sup>12</sup>, Frank Geller, M.S.<sup>12</sup>, Bjarke Feenstra, Ph.D.<sup>12</sup>, Wei Wang,  
7 Ph.D.,<sup>13</sup> Adam Auton, Ph.D.,<sup>13</sup> 23andMe Research Team, Soumya Raychaudhuri,  
8 M.D., Ph.D.,<sup>7-11,14</sup> Tõnu Esko, Ph.D.,<sup>1</sup>, Andres Metspalu, M.D., Ph.D.,<sup>1</sup>, Sven  
9 Laur, Ph.D.,<sup>6,15</sup>, Michael V Holmes, M.D., Ph.D.,<sup>4,16-18\*</sup>, Cecilia M Lindgren,  
10 Ph.D.,<sup>3,4,16,19\*</sup>, Reedik Mägi, Ph.D.,<sup>1\*</sup>, Lili Milani, Ph.D.,<sup>1\*</sup>, João Fadista, Ph.D.,<sup>12,20-21\*</sup>

11  
12 <sup>1</sup>Estonian Genome Center, Institute of Genomics, University of Tartu, Tartu, Estonia  
13 <sup>2</sup>Institute of Molecular and Cell Biology, University of Tartu, Tartu, Riia 23, 51010, Estonia  
14 <sup>3</sup>Wellcome Centre for Human Genetics, Nuffield Department of Medicine, University of Oxford,  
15 Oxford, OX3 7BN, United Kingdom  
16 <sup>4</sup>Big Data Institute at the Li Ka Shing Centre for Health Information and Discovery, University of  
17 Oxford, Oxford, OX3 7FZ, United Kingdom.  
18 <sup>5</sup>Institute of Mathematics and Statistics, University of Tartu  
19 <sup>6</sup>Institute of Computer Science, University of Tartu, Tartu, Estonia  
20 <sup>7</sup>Division of Rheumatology, Immunology, and Allergy, Brigham and Women's Hospital, Harvard  
21 Medical School, Boston, MA, USA  
22 <sup>8</sup>Division of Genetics, Brigham and Women's Hospital, Harvard Medical School, Boston, MA, USA  
23 <sup>9</sup>Broad Institute of MIT and Harvard, Cambridge, MA, USA  
24 <sup>10</sup>Department of Biomedical Informatics, Harvard Medical School, Boston, MA, USA  
25 <sup>11</sup>Center for Data Sciences, Brigham and Women's Hospital, Harvard Medical School, Boston, MA,  
26 USA  
27 <sup>12</sup>Department of Epidemiology Research, Statens Serum Institut, Copenhagen, Denmark  
28 <sup>13</sup>23andMe, Inc., Sunnyvale, CA, USA  
29 <sup>14</sup>Arthritis Research UK Centre for Genetics and Genomics, Manchester Academic Health Science  
30 Centre, University of Manchester, Manchester, UK  
31 <sup>15</sup>STACC, Tartu, Estonia  
32 <sup>16</sup>National Institute for Health Research Oxford Biomedical Research Centre, Oxford University  
33 Hospitals NHS Foundation Trust, John Radcliffe Hospital, Oxford, United Kingdom  
34 <sup>17</sup>Clinical Trial Service Unit and Epidemiological Studies Unit (CTSU), Nuffield Department of  
35 Population Health, University of Oxford, Oxford, OX3 7LF, United Kingdom  
36 <sup>18</sup>Medical Research Council Population Health Research Unit (MRC PHRU), Nuffield Department of  
37 Population Health, University of Oxford, Oxford, OX3 7LF, United Kingdom  
38 <sup>19</sup>Program in Medical and Population Genetics, Broad Institute, Cambridge, MA, USA  
39 <sup>20</sup>Department of Clinical Sciences, Lund University Diabetes Centre, Malmö, Sweden  
40 <sup>21</sup>Institute for Molecular Medicine Finland (FIMM), University of Helsinki, Helsinki, Finland

41  
42 \* These authors contributed equally

43  
44 Corresponding author

45  
46 Lili Milani, PhD  
47 Phone +372-53045400  
48 E-mail [lili.milani@ut.ee](mailto:lili.milani@ut.ee)

49  
50

51

52 **Abstract**

53 **Background**

54 Hypersensitivity reactions to drugs are often unpredictable and can be life-  
55 threatening, underscoring a need for understanding their underlying mechanisms  
56 and risk factors. The extent to which germline genetic variation influences the risk of  
57 commonly reported drug allergies such as penicillin allergy remains largely unknown.

58 **Methods**

59 We extracted data from the electronic health records of 52,000 Estonian and  
60 500,000 UK biobank participants to study the role of genetic variation in the  
61 occurrence of penicillin hypersensitivity reactions. We used imputed SNP to HLA  
62 typing data from up to 22,554 and 488,377 individuals from the Estonian and UK  
63 cohorts, respectively, to further fine-map the human leukocyte antigen (HLA)  
64 association and replicated our results in two additional cohorts involving a total of  
65 1.14 million individuals.

66 **Results**

67 Genome-wide meta-analysis of penicillin allergy revealed a significant association  
68 located in the HLA region on chromosome 6. The signal was further fine-mapped to  
69 the HLA-B\*55:01 allele (OR 1.47 95% CI 1.37-1.58, P-value  $4.63 \times 10^{-26}$ ) and  
70 confirmed by independent replication in two cohorts. The meta-analysis of all four  
71 cohorts in the study revealed a strong association of HLA-B\*55:01 allele with  
72 penicillin allergy (OR 1.33 95% CI 1.29-1.37, P-value  $2.23 \times 10^{-72}$ ). *In silico* follow-up  
73 suggests a potential effect on T lymphocytes at HLA-B\*55:01.

74 **Conclusion**

75 We present the first robust evidence for the role of an allele of the major  
76 histocompatibility complex (MHC) I gene HLA-B in the occurrence of penicillin  
77 allergy.

78

79 **MAIN**

80

81 Adverse drug reactions (ADRs) are common in clinical practice and are associated  
82 with high morbidity and mortality. A meta-analysis of prospective studies in the US  
83 revealed the incidence of serious ADRs to be 6.7% among hospitalized patients, and  
84 the cause of more than 100,000 deaths annually <sup>1</sup>. In Europe, ADRs are responsible  
85 for 3.5% of all hospital admissions, with 10.1% of patients experiencing ADRs during  
86 hospitalization and 197,000 fatal cases per year <sup>2,3</sup>. In the US, the cost of a single  
87 ADR event falls between 1,439 to 13,462 USD <sup>4</sup>.

88

89 ADRs are typically divided into two types of reactions. Type A reactions are more  
90 predictable and related to the pharmacological action of a drug, whereas type B  
91 reactions are idiosyncratic, less predictable, largely dose-independent, and typically  
92 driven by hypersensitivity reactions involving the immune system <sup>5</sup>. Although type B  
93 reactions are less frequent (<20%) than type A reactions, they tend to be more  
94 severe and more often lead to the withdrawal of a drug from the market <sup>6</sup>. One of the  
95 most common causes of type B reactions are antibiotics <sup>5</sup>, typically from the beta-  
96 lactam class, with the prevalence of penicillin allergy estimated to be as high as 25%  
97 in some settings <sup>7,8</sup>. Despite the relative frequency of such reactions, there are very  
98 few studies of the genetic determinants of penicillin allergy <sup>9,10</sup>. This underscores the

99 need for a better understanding of the mechanisms and risk factors, including the  
100 role of genetic variation, that contribute to these reactions.

101

102 The increasing availability of genetic and phenotypic data in large biobanks provides  
103 an opportune means for investigating the role of genetic variation in drug-induced  
104 hypersensitivity reactions. In the present study, we sought to identify genetic risk  
105 factors underlying penicillin-induced hypersensitivity reactions by harnessing data  
106 from the Estonian (EstBB) and UK Biobanks (UKBB), with further replication in two  
107 large cohorts.

108

## 109 **METHODS**

110

### 111 **Study subjects**

112 We studied individual-level genotypic and phenotypic data of 52,000 participants  
113 from the Estonian Biobank (EstBB) and 500,000 participants from UK Biobank  
114 (UKBB). Both are population-based cohorts, providing a rich variety of phenotypic  
115 and health-related information collected for each participant. We extracted  
116 information on penicillin allergy by searching the records of the participants for Z88.0  
117 ICD10 code indicating patient-reported allergy status due to penicillin. Information on  
118 phenotypic features like age and gender were obtained from the biobank recruitment  
119 records. We also extracted likely penicillin allergies in the EstBB from the recruitment  
120 questionnaires and free text fields of the electronic health records (EHRs) using a  
121 rule-based approach (see **Supplementary methods** for further details).

122

123

## 124 **Genome-wide study and meta-analysis**

125 The details on genotyping, quality control and imputation are fully described  
126 elsewhere for both EstBB<sup>11,12</sup> and UKBB<sup>13</sup>. In the Estonian biobank, we conducted  
127 the penicillin GWAS among 31,760 unrelated individuals of whom 961 were cases  
128 with self-reported allergy to J01C beta-lactam drugs and 30,799 undiagnosed  
129 controls. In the UKBB, GWAS on penicillin allergy (Z88.0) was performed among  
130 15,690 cases and 342,116 controls. The analyses were adjusted for the first ten PCs  
131 of the genotype matrix, as well as for age, sex and array (see **Supplementary**  
132 **methods**). We performed meta-analysis of 19,051,157 markers (MAF>0.1%) based  
133 on effect sizes and their standard errors using METAL<sup>14</sup>. Results were visualized  
134 with R software (3.3.2)<sup>15</sup>.

135

## 136 **HLA-typing**

137 HLA-typing of the EstBB genotype data was performed at the Broad Institute using  
138 the SNP2HLA tool<sup>16</sup>. The imputation was done for genotype data generated on the  
139 GSA, and after quality control the four-digit HLA alleles of 22,554 individuals were  
140 used for analysis. In UKBB we used four-digit imputed HLA data released by UKBB  
141<sup>13,17</sup>. The imputation process, performed using HLA\*IMP:02<sup>18</sup>, is described more  
142 fully elsewhere<sup>13</sup> and in the **Supplementary methods**.

143

144 We performed separate additive logistic regression analysis with the called HLA  
145 alleles using R *glm* function in EstBB and UKBB including age, sex and 10 PCs as  
146 covariates. Meta-analysis of 162 HLA alleles was performed with the GWAMA  
147 software tool<sup>19</sup>. A Bonferroni-corrected P-value threshold of  $3.09 \times 10^{-4}$  was applied  
148 based on the number of tested alleles: 0.05/162.

149

150 For detection of the strongest tagging SNP for the HLA-B\*55:01 allele we calculated  
151 Pearson correlation coefficients between the HLA-B\*55:01 allele and all the SNPs  
152 within +/- 50kb of the HLA-B gene region using R (3.3.2) <sup>15</sup> *cor* function.

153

#### 154 **HLA-B\*55:01 replication**

155 Replication analysis of the HLA-B\*55:01 allele was tested on 87,996 cases and  
156 1,031,087 controls of European ancestry (close relatives removed) from the  
157 23andMe research cohort using a logistic regression assuming an additive model  
158 (see details in the **Supplementary methods**). The self-reported phenotype of  
159 penicillin allergy was defined as an allergy test or allergic symptoms required for  
160 cases, with controls having no allergy. Estimates from BioVu were extracted from the  
161 BioVu publicly available data resource (<https://phewascatalog.org/hla>).  
162 Meta-analysis of the HLA-B\*55:01 association in four cohorts was performed with the  
163 GWAMA software tool <sup>19</sup> and results were visualized with R software (3.3.2) <sup>15</sup>.

164

## 165 **RESULTS**

166

### 167 **GENOME-WIDE ASSOCIATION ANALYSIS OF PENICILLIN ALLERGY**

168 To discover genetic factors that may predispose to penicillin allergy, we conducted a  
169 genome-wide association study (GWAS) of 19.1 million single-nucleotide  
170 polymorphisms (SNPs) and insertions/deletions in UKBB and EstBB (minor allele  
171 frequency filter in both cohorts MAF > 0.1%). Cases were defined as participants  
172 with a Z88.0 ICD10 code ("Allergy status to penicillin") for a reported history of  
173 penicillin allergy. In total, we identified 15,690 unrelated individuals (4.2% of the total

174 cohort size of 377,545) in UKBB with this diagnostic code. However, the  
175 corresponding number of cases in EstBB was only 7 (0.02% of the total cohort size  
176 of 32,608) suggesting heterogeneity in the use of the Z88.0 ICD10 code in different  
177 countries. We therefore also identified participants that had self-reported drug allergy  
178 at recruitment in EstBB and categorized the EstBB self-reported reactions by drug  
179 class, using the Anatomical Therapeutic Chemical (ATC) Classification System code  
180 J01C\* (beta-lactam antibacterials, penicillins) to match this to the respective Z88.0  
181 ICD10 code. This resulted in 961 (2.9%) unrelated cases with penicillin allergy in  
182 EstBB. We validated the approach in EstBB by evaluating the association between  
183 the number of filled (i.e. prescribed and purchased) penicillin (using the ATC code  
184 J01C\*) prescriptions per person and self-reported penicillin allergy. Using Poisson  
185 regression analysis, we identified a negative effect on the number of filled penicillin  
186 prescriptions among individuals with self-reported allergy in EstBB (P-value  $2.41 \times 10^{-15}$ ,  
187 Estimate -0.18 i.e. prescription count is 16% lower for individuals with penicillin  
188 allergy).

189 We then meta-analyzed the results of the GWASes in these two cohorts, weighing  
190 effect size estimates using the inverse of the corresponding standard errors. We  
191 identified a strong genome-wide significant ( $p < 5 \times 10^{-8}$ ) signal for penicillin induced  
192 allergy (defined as ICD10 code Z88.0 or reported allergy to drugs in ATC J01C\*  
193 class) on chromosome 6 in the major histocompatibility complex (MHC) region (lead  
194 variant rs114892859, MAF(EstBB) = 0.7%, MAF(UKBB) = 2%,  $P = 4.59 \times 10^{-29}$ , OR  
195 1.59 95% CI 1.47-1.73) (**Figure 1; Table S1**).

196

197

198

## 199 FINE-MAPPING THE PENICILLIN ALLERGY-ASSOCIATED HLA LOCUS

200 To further fine-map the causal variant of the identified association with penicillin  
201 allergy, we performed a functional annotation analysis with FUMA (Functional  
202 Mapping and Annotation of Genome-Wide Association Studies)<sup>20</sup>. We detected an  
203 independent intronic lead SNP for the penicillin allergy meta-analysis (GWAS lead  
204 variant rs114892859, P-value  $2.21 \times 10^{-28}$ ) in the *MICA* gene (**Figure 1, B**). When  
205 testing the SNP for expression quantitative trait locus (eQTL) associations in blood  
206 based on data from the eQTLGen Consortium<sup>21</sup>, the variant appeared to be  
207 associated with the expression levels of several nearby genes, with the most  
208 significant being *PSORS1C3* (P-value  $8.10 \times 10^{-62}$ ) and *MICA* (P-value  $1.21 \times 10^{-52}$ )  
209 (**Table S2**). We further performed an *in silico* investigation of the lead SNP  
210 rs114892859 and its best proxy (rs144626001, the only proxy with  $r^2 > 0.9$  in UKBB  
211 and EstBB) in HaploReg v4 to explore annotations and impact of the non-coding  
212 variant<sup>22</sup>. In particular rs114892859 had several annotations indicative of a  
213 regulatory function, including its location in both promoter and enhancer marks in T-  
214 cells and evidence of RNA polymerase II binding<sup>23,24</sup>. Interestingly, its proxy is more  
215 likely to be deleterious based on the scaled Combined Annotation Dependent  
216 Depletion (CADD) score (scaled score of 15.78 for rs144626001 (C/T) and 4.472 for  
217 rs114892859 (G/T))<sup>25,26</sup>.

218

219 Due to the high LD in the MHC region, we used imputed SNP to HLA typing data  
220 available at four-digit resolution<sup>27</sup> for up to 22,554 and 488,377 individuals from the  
221 Estonian and UK cohorts, respectively, to further fine-map the identified HLA  
222 association with penicillin allergy. In both cohorts a shared total of 103 alleles at four-  
223 digit level were present for all of the MHC class I genes (*HLA-A*, *HLA-B*, *HLA-C*) and



224 59 alleles for three of the classical MHC class II genes (*HLA-DRB1*, *HLA-DQA1*,  
225 *HLA-DQB1*). To assess the variation in the frequencies of the HLA alleles in different  
226 populations, we compared the obtained allele frequencies in both cohorts (**Table S3**)  
227 with the frequencies of HLA alleles in different European, Asian and African  
228 populations reported in the HLA frequency database (**Figure S2 and S3, Table S4**).

229

230 We then used an additive logistic regression model to test for associations between  
231 different four-digit HLA alleles and penicillin allergy in UKBB and EstBB. The results  
232 of both cohorts were meta-analyzed and P-values passing a Bonferroni correction  
233 ( $0.05/162 = 3.09 \times 10^{-4}$ , where 162 is the number of meta-analyzed HLA alleles) were  
234 considered significant (**Table S5**). One of the three results that surpassed the  
235 significance threshold had discordant effects in the two cohorts and one had a  
236 marginally significant association (P-value  $2.81 \times 10^{-4}$ , **Table S5**). The strongest  
237 association we detected for penicillin allergy was the HLA-B\*55:01 allele (P-value  
238  $4.63 \times 10^{-26}$ ; OR 1.47 95% CI 1.37-1.58), which is tagged ( $r^2 > 0.95$ ) by the GWAS lead  
239 variant rs114892859 (**Table S6**).

240

#### 241 **REPLICATION OF HLA-B\*55:01 ASSOCIATION WITH PENICILLIN ALLERGY**

242 To further confirm association with penicillin allergy we analyzed the association of  
243 the HLA-B\*55:01 allele with self-reported penicillin allergy among 87,996 cases and  
244 1,031,087 controls from the 23andMe research cohort. We observed a strong  
245 association (P-value  $1.00 \times 10^{-47}$ ; OR 1.30 95% CI 1.25-1.34; **Figure 2**) with a similar  
246 effect size as seen for the HLA-B\*55:01 allele in the meta-analysis of the EstBB and  
247 UKBB. We obtained further confirmation for this association from the published  
248 dataset of Vanderbilt University's biobank BioVU, where the HLA-B\*55:01 allele was

249 associated with allergy/adverse effect due to penicillin among 58 cases and 23,598  
250 controls (P-value  $1.79 \times 10^{-2}$ ; OR 2.15 95% CI 1.19-6.5; **Figure 2**)<sup>28</sup>. Meta-analysis of  
251 results from discovery and replication cohorts demonstrated a strong association of  
252 the HLA-B\*55:01 allele with penicillin allergy (P-value  $2.23 \times 10^{-72}$ ; OR 1.33 95% CI  
253 1.29-1.37; **Figure 2**).

254

#### 255 **FURTHER ASSOCIATIONS AT HLA-B\*55:01**

256 Finally, we used the Open Targets Genetics platform's UKBB PheWAS data<sup>29</sup> to  
257 further characterize the association of the GWAS lead variant (and HLA-B\*55:01  
258 allele tag-SNP) rs114892859 (**Table S6**) with other traits. We found strong  
259 associations with lower lymphocyte counts (P-value  $9.21 \times 10^{-14}$ , -0.098 cells per  
260 nanoliter, per allergy-increasing T allele) and lower white blood cell counts (P-value  
261  $3.17 \times 10^{-9}$ , -0.078 cells per nanoliter, per allergy-increasing T allele). To confirm this  
262 association, we extracted data on lymphocyte counts from the EHRs data of 4,567  
263 EstBB participants (see **Supplementary methods**), and observed the same inverse  
264 association of the HLA-B\*55:01 allele with lymphocyte counts (-0.148 cells per  
265 nanoliter, per T allele; P-value=0.047).

266

#### 267 **DISCUSSION**

268

269 In the present study, we identify a strong genome-wide significant association of the  
270 HLA-B\*55:01 allele with penicillin allergy using data from four large cohorts: UKBB,  
271 EstBB, 23andMe and BioVu.

272

273 Hypersensitivity or allergic reactions to medications are type B adverse drug  
274 reactions that are known to be mediated by the immune system. One major driver of  
275 hypersensitivity reactions is thought to be the HLA system, which plays a role in  
276 inducing the immune response through T cell stimulation, and is encoded by the  
277 most polymorphic region in the human genome<sup>30</sup>. Genetic variation in the HLA  
278 region alters the shape of the peptide-binding pocket in HLA molecules, and enables  
279 their binding to a vast number of different peptides – a crucial step in the adaptive  
280 immune response<sup>31</sup>. However, this ability of HLA molecules to bind a wide variety of  
281 peptides may also facilitate binding of exogenous molecules such as drugs,  
282 potentially leading to off-target drug effects and immune-mediated ADRs<sup>32</sup>. The  
283 precise mechanism of most HLA-drug interactions remains unknown, but it seems  
284 that T cell activation is necessary for the majority of HLA-mediated ADRs<sup>32-34</sup>.  
285 Despite the increasing evidence for a role of the HLA system in drug-induced  
286 hypersensitivity, much is still unclear, including how genetic variation in the HLA  
287 region predisposes to specific drug reactions.

288

289 Penicillin is the most common cause of drug allergy, with clinical manifestations  
290 ranging from relatively benign cutaneous reactions to life-threatening systemic  
291 syndromes<sup>7,8</sup>. There is a previous GWAS on the immediate type of penicillin allergy,  
292 where a borderline genome-wide significant protective association of an allele of the  
293 MHC class II gene *HLA-DRA* was detected and further replicated in a different cohort  
294<sup>35</sup>. Here we detect a robust association between penicillin allergy and an allele of the  
295 MHC class I gene *HLA-B*. The allele and its tag-SNP were also associated with  
296 lower lymphocyte levels and overlapped with T cell regulatory annotations, which  
297 suggests that the variant may predispose to a T-cell-mediated, delayed type of

298 penicillin allergy. MHC I molecules are expressed by almost all cells and present  
299 peptides to cytotoxic CD8+ T cells, whereas MHC II molecules are expressed by  
300 antigen-presenting cells to present peptides to CD4+ T helper lymphocytes<sup>31,34</sup>.  
301 There are several examples of MHC I alleles associated with drug-induced  
302 hypersensitivity mediated by CD8+ T cells<sup>34,36,37</sup>. The involvement of T cells in  
303 delayed hypersensitivity reactions has been shown by isolating drug reactive T cell  
304 clones<sup>38</sup>, and cytotoxic CD8+ T cells have been shown to be relevant especially in  
305 allergic skin reactions<sup>39-41</sup>. More than twenty years ago, CD8+ T cells reactive to  
306 penicillin were isolated from patients with delayed type of hypersensitivity to penicillin  
307<sup>42</sup>. The association with the HLA-B\*55:01 allele detected in our study might be a  
308 relevant factor in this previously established connection with CD8+ T cells. The HLA-  
309 B\*55:01 allele, together with other HLA-B alleles that share a common "E pocket  
310 sequence", has previously been associated with increased risk for eosinophilia and  
311 systemic symptoms, Stevens-Johnson Syndrome and toxic epidermal necrolysis  
312 (SJS/TEN) among patients treated with nevirapine<sup>43</sup>. The underlying mechanism in  
313 penicillin allergy remains a question and various models have been proposed for T-  
314 cell-mediated hypersensitivity<sup>36,41</sup>. For example, the hapten model suggests that  
315 drugs may alter proteins and thereby induce an immune response<sup>36,44</sup> – penicillins  
316 have been shown to bind proteins<sup>44,45</sup> to form hapten-carrier complexes, which may  
317 in turn elicit a T cell response<sup>46</sup>. Drugs may also bind with MHC molecules directly.  
318 For example, abacavir has been shown to bind non-covalently to the peptide-binding  
319 groove of HLA-B\*57:01, leading to a CD8+ T cell-mediated hypersensitivity response  
320<sup>47</sup>.  
321

322 It is being increasingly recognized that the involvement of HLA variation in  
323 hypersensitivity reactions goes beyond peptide specificity. Other factors, such as  
324 effects on HLA expression that influence the strength of the immune response have  
325 also been described <sup>48</sup>. The analysis of eQTLs based on the data of the eQTLGen  
326 Consortium <sup>21</sup> revealed that the T allele of the lead SNP rs114892859 identified in  
327 our GWAS of penicillin allergy appears to be associated with the expression of  
328 several nearby genes, including lower expression of both *HLA-B* and *HLA-C*, and an  
329 even stronger effect on RNA levels of *PSORS1C3* and *MICA* (**Table S2**).

330 Interestingly, variants in the *PSORS1C3* gene have been associated with the risk of  
331 allopurinol, carbamazepine and phenytoin induced SJS/TEN hypersensitivity  
332 reactions <sup>49</sup>. *MICA* encodes the protein MHC class I polypeptide-related sequence A  
333 <sup>50</sup> which has been implicated in immune surveillance <sup>51,52</sup>. Our findings therefore  
334 support the observation that variants associated with expression of HLA genes may  
335 contribute to the development of hypersensitivity reactions. We detect strong  
336 evidence for the involvement of HLA-B\*55:01 in penicillin allergy, and a marginally  
337 significant association in the MHC II gene DRB1, although both need further  
338 functional investigation to explore their exact roles and mechanisms in the induced  
339 response.

340

341 The main limitation of this study is the unverified nature of the phenotypes extracted  
342 from EHRs and self-reported data in the biobanks. Previous work has found that  
343 most individuals labeled as having beta-lactam hypersensitivity may not actually  
344 have true hypersensitivity <sup>7,8,53</sup>. Nevertheless, despite the possibility that some cases  
345 in our study may be misclassified, we detect a robust HLA association that was  
346 replicated in several independent cohorts against related phenotypes. The increased

347 power arising from biobank-scale sample sizes therefore mitigates some of the  
348 challenges associated with EHR data. The robustness of the genetic signal across  
349 cohorts with orthogonal phenotyping methods, ranging from EHR-sourced in UKBB  
350 to various forms of self-reported data in EstBB and 23andMe, also supports a true  
351 association. Finally, the modest effect size of the HLA-B\*55:01 allele (OR 1.33),  
352 particularly when compared to effect sizes of HLA alleles with established  
353 pharmacogenetic relevance<sup>54–56</sup>, suggests that this variant in isolation is unlikely to  
354 have clinically meaningful predictive value. However, further phenotypic refinement,  
355 including investigation of specific penicillin-based medicines and specific types of  
356 drug reactions, may yield more clinically actionable insight. Our work also provides  
357 the foundation for further studies to investigate the application of a polygenic risk  
358 score<sup>57</sup> (which combines the effects of many thousands of trait-associated variants  
359 into a single score), possibly in combination with phenotypic risk factors, in  
360 identifying individuals at elevated risk of penicillin allergy.

361

362 In summary, our results provide novel evidence of a robust genome-wide significant  
363 association of HLA and the HLA-B\*55:01 allele with penicillin allergy. Further  
364 phenotypic refinement, including investigation of specific penicillin-based medicines  
365 and specific types of drug reactions, may also yield more clinically actionable insight.

366

### 367 **Acknowledgements**

368 This study has been supported by grants from the Estonian Research Council grant  
369 numbers PRG184, PRG687, IUT20-60 and IUT24-6, and the Oak Foundation. This  
370 work was carried out in part in the High Performance Computing Center of University  
371 of Tartu. We acknowledge the Finnish SISu Project and principal investigators Aarno

372 Palotie, Jaana Suvisaari, Veikko Salomaa, and Priit Palta for sharing the Finnish  
373 imputation reference panel. This research has been conducted using the UK  
374 Biobank Resource under Application Number 11867. We thank the research  
375 participants of 23andMe for their contribution to this study and the 23andMe  
376 Research Team. We further thank all the participants and staff of the Estonian, UK  
377 and Vanderbilt university biobanks for their contribution to this research.  
378 J.B. is supported by funding from the Rhodes Trust, Clarendon Fund and the  
379 Medical Sciences Doctoral Training Centre, University of Oxford. J.C.C. is funded by  
380 the Oxford Medical Research Council Doctoral Training Partnership (Oxford MRC  
381 DTP) and the Nuffield Department of Clinical Medicine, University of Oxford. C.M.L.  
382 is supported by the Li Ka Shing Foundation; WT-SSI/John Fell funds; the NIHR  
383 Biomedical Research Centre, Oxford; Widenlife; and NIH (5P50HD028138-27).  
384 M.V.H. works in a unit that receives funding from the MRC and is supported by a  
385 British Heart Foundation Intermediate Clinical Research Fellowship  
386 (FS/18/23/33512) and the National Institute for Health Research Oxford Biomedical  
387 Research Centre. Computation used the Oxford Biomedical Research Computing  
388 (BMRC) facility, a joint development between the Wellcome Centre for Human  
389 Genetics and the Big Data Institute supported by Health Data Research UK and the  
390 NIHR Oxford Biomedical Research Centre. Financial support was provided by the  
391 Wellcome Trust Core Award Grant Number 203141/Z/16/Z. The views expressed are  
392 those of the author(s) and not necessarily those of the NHS, the NIHR or the  
393 Department of Health.  
394  
395  
396

397 **Author Contributions**

398

399 K.K., L.M. and J.F. designed the study. R.M., M.L., Y.L., S.R., A.M. and T.E.  
400 supervised and generated genotype data or HLA typing data. D.S. and S.L.  
401 generated allergy data from free-text. K.K., J.B., M.L., T.J., J.C.C., J.F, W.W., A.A.,  
402 performed the data analysis. K.K., J.B., M.V.H. C.M.L., R.M., L.M., J.C.C. and J.F.  
403 conducted data interpretation. K.K. prepared the figures and tables. K.K, J.B., L.M.  
404 and J.F. drafted the manuscript. K.K., J.B., M.V.H. C.M.L., M.L., R.M., L.M., J.C.C.,  
405 W.W., A.A. and J.F. reviewed and edited the manuscript. All authors contributed to  
406 critical revisions and approved the final manuscript.

407 The following members of the 23andMe Research Team contributed to this study:

408 Michelle Agee, Stella Aslibekyan, Robert K. Bell, Katarzyna Bryc, Sarah K. Clark,  
409 Sarah L. Elson, Kipper Fletez-Brant, Pierre Fontanillas, Nicholas A. Furlotte, Pooja  
410 M. Gandhi, Karl Heilbron, Barry Hicks, David A. Hinds, Karen E. Huber, Ethan M.  
411 Jewett, Yunxuan Jiang, Aaron Kleinman, Keng-Han Lin, Nadia K. Litterman, Marie K.  
412 Luff, Jennifer C. McCreight, Matthew H. McIntyre, Kimberly F. McManus, Joanna L.  
413 Mountain, Sahar V. Mozaffari, Priyanka Nandakumar, Elizabeth S. Noblin, Carrie  
414 A.M. Northover, Jared O'Connell, Aaron A. Petrakovitz, Steven J. Pitts, G. David  
415 Poznik, J. Fah Sathirapongsasuti, Anjali J. Shastri, Janie F. Shelton, Suyash  
416 Shringarpure, Chao Tian, Joyce Y. Tung, Robert J. Tunney, Vladimir Vacic, Xin  
417 Wang, Amir S. Zare.

418

419 **Competing Interests statement**

420 C.M.L. has collaborated with Novo Nordisk and Bayer in research, and in  
421 accordance with a university agreement, did not accept any personal payment.



422 W.W., A.A., and members of the 23andMe Research Team are employed by and  
423 hold stock or stock options in 23andMe, Inc.

424

## 425 **References**

- 426 1. Lazarou J, Pomeranz BH, Corey PN. Incidence of Adverse Drug Reactions in  
427 Hospitalized Patients. *Jama* 2003;279(15):1200.
- 428 2. Santoro A, Genov G, Spooner A, Raine J, Arlett P. Promoting and Protecting  
429 Public Health: How the European Union Pharmacovigilance System Works.  
430 *Drug Saf* 2017;40(10):855–69.
- 431 3. Bouvy JC, De Bruin ML, Koopmanschap MA. Epidemiology of Adverse Drug  
432 Reactions in Europe: A Review of Recent Observational Studies. *Drug Saf*.  
433 2015;38(5):437–53.
- 434 4. Alagoz O, Durham D, Kasirajan K. Cost-effectiveness of one-time genetic  
435 testing to minimize lifetime adverse drug reactions. *Pharmacogenomics J*  
436 2016;16(2):129–36.
- 437 5. Böhm R, Cascorbi I. Pharmacogenetics and predictive testing of drug  
438 hypersensitivity reactions. *Front. Pharmacol.* 2016;7(OCT).
- 439 6. Iasella CJ, Johnson HJ, Dunn MA. Adverse Drug Reactions: Type A (Intrinsic)  
440 or Type B (Idiosyncratic). *Clin. Liver Dis.* 2017;21(1):73–87.
- 441 7. Blumenthal KG, Peter JG, Trubiano JA, Phillips EJ. Antibiotic allergy. *Lancet*.  
442 2019;393(10167):183–98.
- 443 8. Castells M, Khan DA, Phillips EJ. Penicillin Allergy. *N Engl J Med*  
444 2019;381(24):2338–51.
- 445 9. Mirakian R, Leech SC, Krishna MT, et al. Management of allergy to penicillins  
446 and other beta-lactams. *Clin Exp Allergy* 2015;45(2):300–27.

- 447 10. Bulletin D and T. Penicillin allergy-getting the label right. *BMJ* 2017;358.
- 448 11. Mitt M, Kals M, Pärn K, et al. Improved imputation accuracy of rare and low-  
449 frequency variants using population-specific high-coverage WGS-based  
450 imputation reference panel. *Eur J Hum Genet EJHG* 2017;25(7):869–76.
- 451 12. Kals M, Nikopensius T, Läll K, et al. Advantages of genotype imputation with  
452 ethnically matched reference panel for rare variant association analyses.  
453 *bioRxiv* 2019;579201.
- 454 13. Bycroft C, Freeman C, Petkova D, et al. The UK Biobank resource with deep  
455 phenotyping and genomic data. *Nature* 2018;562(7726):203–9.
- 456 14. Willer CJ, Li Y, Abecasis GR. METAL: Fast and efficient meta-analysis of  
457 genomewide association scans. *Bioinformatics* 2010;26(17):2190–1.
- 458 15. R Core Team. R: a language and environment for statistical computing.  
459 2018;Available from: <https://www.r-project.org/>
- 460 16. Jia X, Han B, Onengut-Gumuscu S, et al. Imputing Amino Acid Polymorphisms  
461 in Human Leukocyte Antigens. *PLoS One* 2013;8(6):e64683.
- 462 17. UKB  $\square$ : Resource 182.;Available from:  
463 <https://biobank.ndph.ox.ac.uk/showcase/refer.cgi?id=182>
- 464 18. Dillthey A, Leslie S, Moutsianas L, et al. Multi-Population Classical HLA Type  
465 Imputation. *PLoS Comput Biol* 2013;9(2):e1002877.
- 466 19. Mägi R, Morris AP. GWAMA: software for genome-wide association meta-  
467 analysis. *BMC Bioinformatics* 2010;11(1):288.
- 468 20. Watanabe K, Taskesen E, Van Bochoven A, Posthuma D. Functional mapping  
469 and annotation of genetic associations with FUMA. *Nat Commun* 2017;8(1):1–  
470 11.
- 471 21. Võsa U, Claringbould A, Westra H-J, et al. Unraveling the polygenic

- 472 architecture of complex traits using blood eQTL metaanalysis. *bioRxiv*  
473 2018;447367.
- 474 22. Ward LD, Kellis M. HaploReg: a resource for exploring chromatin states,  
475 conservation, and regulatory motif alterations within sets of genetically linked  
476 variants. *Nucleic Acids Res* 2012;40(D1):D930–4.
- 477 23. Roadmap Epigenomics Consortium, Kundaje A, Meuleman W, et al.  
478 Integrative analysis of 111 reference human epigenomes. *Nature*  
479 2015;518(7539):317–29.
- 480 24. Myers RM, Stamatoyannopoulos J, Snyder M, et al. A User's Guide to the  
481 Encyclopedia of DNA Elements (ENCODE). *PLoS Biol* 2011;9(4):e1001046.
- 482 25. Rentzsch P, Witten D, Cooper GM, Shendure J, Kircher M. CADD: predicting  
483 the deleteriousness of variants throughout the human genome. *Nucleic Acids*  
484 *Res* 2019;47(D1):D886–94.
- 485 26. Kircher M, Witten DM, Jain P, O’roak BJ, Cooper GM, Shendure J. A general  
486 framework for estimating the relative pathogenicity of human genetic variants.  
487 *Nat Genet* 2014;46(3):310–5.
- 488 27. Marsh SGE, Albert ED, Bodmer WF, et al. Nomenclature for factors of the HLA  
489 system, 2010. *Tissue Antigens*. 2010;75(4):291–455.
- 490 28. Karnes JH, Bastarache L, Shaffer CM, et al. Phenome-wide scanning identifies  
491 multiple diseases and disease severity phenotypes associated with HLA  
492 variants. *Sci Transl Med* 2017;9(389).
- 493 29. Koscielny G, An P, Carvalho-Silva D, et al. Open Targets: a platform for  
494 therapeutic target identification and validation. *Nucleic Acids Res*  
495 2017;45(D1):D985–94.
- 496 30. Williams TM. Human leukocyte antigen gene polymorphism and the

- 497 histocompatibility laboratory. *J. Mol. Diagnostics*. 2001;3(3):98–104.
- 498 31. Chaplin DD. Overview of the immune response. *J Allergy Clin Immunol*  
499 2010;125(2 SUPPL. 2):S3–23.
- 500 32. Illing PT, Purcell AW, McCluskey J. The role of HLA genes in  
501 pharmacogenomics: unravelling HLA associated adverse drug reactions.  
502 *Immunogenetics*. 2017;69(8–9):617–30.
- 503 33. Pavlos R, Mallal S, Phillips E. HLA and pharmacogenetics of drug  
504 hypersensitivity. *Pharmacogenomics* 2012;13(11):1285–306.
- 505 34. Negrini S, Becquemont L. HLA-associated drug hypersensitivity and the  
506 prediction of adverse drug reactions. *Pharmacogenomics*. 2017;18(15):1441–  
507 57.
- 508 35. Guéant JL, Romano A, Cornejo-Garcia JA, et al. HLA-DRA variants predict  
509 penicillin allergy in genome-wide fine-mapping genotyping. *J Allergy Clin*  
510 *Immunol* 2015;135(1):253-259.e10.
- 511 36. Pavlos R, Mallal S, Ostrov D, et al. T Cell–Mediated Hypersensitivity Reactions  
512 to Drugs. *Annu Rev Med* 2015;66(1):439–54.
- 513 37. Sousa-Pinto B, Correia C, Gomes L, et al. HLA and delayed drug-induced  
514 hypersensitivity. *Int. Arch. Allergy Immunol*. 2016;170(3):163–79.
- 515 38. Yawalkar, Egli, Hari, Nievergelt, Braathen, Pichler. Infiltration of cytotoxic T  
516 cells in drug-induced cutaneous eruptions. *Clin Allergy* 2000;30(6):847–55.
- 517 39. Kalish RS, Askenase PW. Molecular mechanisms of CD8+T cell-mediated  
518 delayed hypersensitivity: Implications for allergies, asthma, and autoimmunity.  
519 *J Allergy Clin Immunol* 1999;103(2 II):192–9.
- 520 40. Romano A, Blanca M, Torres MJ, et al. Diagnosis of nonimmediate reactions  
521 to beta-lactam antibiotics. *Allergy* 2004;59(11):1153–60.

- 522 41. Adam J, Pichler WJ, Yerly D. Delayed drug hypersensitivity: Models of T-cell  
523 stimulation. *Br J Clin Pharmacol* 2011;71(5):701–7.
- 524 42. Hertl M, Geisel J, Boecker C, Merk HF. Selective generation of CD8+ T-cell  
525 clones from the peripheral blood of patients with cutaneous reactions to beta-  
526 lactam antibiotics. *Br J Dermatol* 1993;128(6):619–26.
- 527 43. Pavlos R, McKinnon EJ, Ostrov DA, et al. Shared peptide binding of HLA  
528 Class I and II alleles associate with cutaneous nevirapine hypersensitivity and  
529 identify novel risk allele. *Sci Rep* 2017;7(1):1–12.
- 530 44. Pirmohamed M, Ostrov DA, Park BK. New genetic findings lead the way to a  
531 better understanding of fundamental mechanisms of drug hypersensitivity. *J*  
532 *Allergy Clin Immunol* 2015;136(2):236–44.
- 533 45. Meng X, Jenkins RE, Berry NG, et al. Direct evidence for the formation of  
534 diastereoisomeric benzylpenicilloyl haptens from benzylpenicillin and  
535 benzylpenicillenic acid in patients. *J Pharmacol Exp Ther* 2011;338(3):841–9.
- 536 46. Weltzien HU, Padovan E. Molecular features of penicillin allergy. *J. Invest.*  
537 *Dermatol.* 1998;110(3):203–6.
- 538 47. Chessman D, Kostenko L, Lethborg T, et al. Human Leukocyte Antigen Class  
539 I-Restricted Activation of CD8+ T Cells Provides the Immunogenetic Basis of a  
540 Systemic Drug Hypersensitivity. *Immunity* 2008;28(6):822–32.
- 541 48. Aguiar VRC, César J, Delaneau O, Dermitzakis ET, Meyer D. Expression  
542 estimation and eQTL mapping for HLA genes with a personalized pipeline.  
543 *PLOS Genet* 2019;15(4):e1008091.
- 544 49. Génin E, Schumacher M, Roujeau JC, et al. Genome-wide association study  
545 of Stevens-Johnson syndrome and Toxic Epidermal Necrolysis in Europe.  
546 *Orphanet J Rare Dis* 2011;6(1):52.

- 547 50. Bateman A. UniProt: a worldwide hub of protein knowledge. *Nucleic Acids Res*  
548 2019;47(D1):D506–15.
- 549 51. Duan Q, Li H, Gao C, et al. High glucose promotes pancreatic cancer cells to  
550 escape from immune surveillance via AMPK-Bmi1-GATA2-MICA/B pathway. *J*  
551 *Exp Clin Cancer Res* 2019;38(1):192.
- 552 52. Shafi S, Vantourout P, Wallace G, et al. Human immunology: An NKG2D-  
553 mediated human lymphoid stress surveillance response with high  
554 interindividual variation. *Sci Transl Med* 2011;3(113):113ra124-113ra124.
- 555 53. Shenoy ES, Macy E, Rowe T, Blumenthal KG. Evaluation and Management of  
556 Penicillin Allergy: A Review. *JAMA - J. Am. Med. Assoc.* 2019;321(2):188–99.
- 557 54. Mallal S, Nolan D, Witt C, et al. Association between presence of HLA-B\*5701,  
558 HLA-DR7, and HLA-DQ3 and hypersensitivity to HIV-1 reverse-transcriptase  
559 inhibitor abacavir. *Lancet* 2002;359(9308):727–32.
- 560 55. Chen P, Lin J-J, Lu C-S, et al. Carbamazepine-Induced Toxic Effects and  
561 HLA-B\*1502 Screening in Taiwan. *N Engl J Med* 2011;364(12):1126–33.
- 562 56. McCormack M, Alfirevic A, Bourgeois S, et al. HLA-A\*3101 and  
563 Carbamazepine-Induced Hypersensitivity Reactions in Europeans. *N Engl J*  
564 *Med* 2011;364(12):1134–43.
- 565 57. Hunter DJ, Drazen JM. Has the Genome Granted Our Wish Yet? *N Engl J*  
566 *Med* 2019;380(25):2391–3.

567

568

569 **Figure Legends**

570

571 **Figure 1. Manhattan plot (A) and HLA locus (B) of the genome-wide association study**  
572 **of allergy status to penicillin.**

573 The X-axes indicate chromosomal positions and Y-axes  $-\log_{10}$  of the P-values **(A)** Each dot  
574 represents a single nucleotide polymorphism (SNP). The dotted line indicates the genome-  
575 wide significance ( $P\text{-value} < 5.0 \times 10^{-8}$ ) P-value threshold. **(B)** SNPs are colored according to  
576 their linkage disequilibrium (LD; based on the 1000 Genome phase3 EUR reference panel)  
577 with the lead SNP. The SNP marked with a purple diamond is the top lead SNP  
578 rs114892859 identified depending on LD structure.

579

580 **Figure 2. HLA-B\*55:01 allele association with penicillin allergy-** The odds ratios (dots)  
581 and 95% confidence intervals (CI, horizontal lines) for HLA allele associated with penicillin  
582 allergy. The plot is annotated with P-values and case-control numbers. Color coding blue  
583 and black indicates the results for discovery cohorts Estonian UK biobank and replication  
584 results of the HLA\*B-55:01 allele in 23andMe research cohort (green) and Vanderbilt  
585 University's biobank BioVU (purple). Results of the meta-analysis of all four cohorts is  
586 indicated with a diamond (red).

587

588 **Figure 1.**  
589

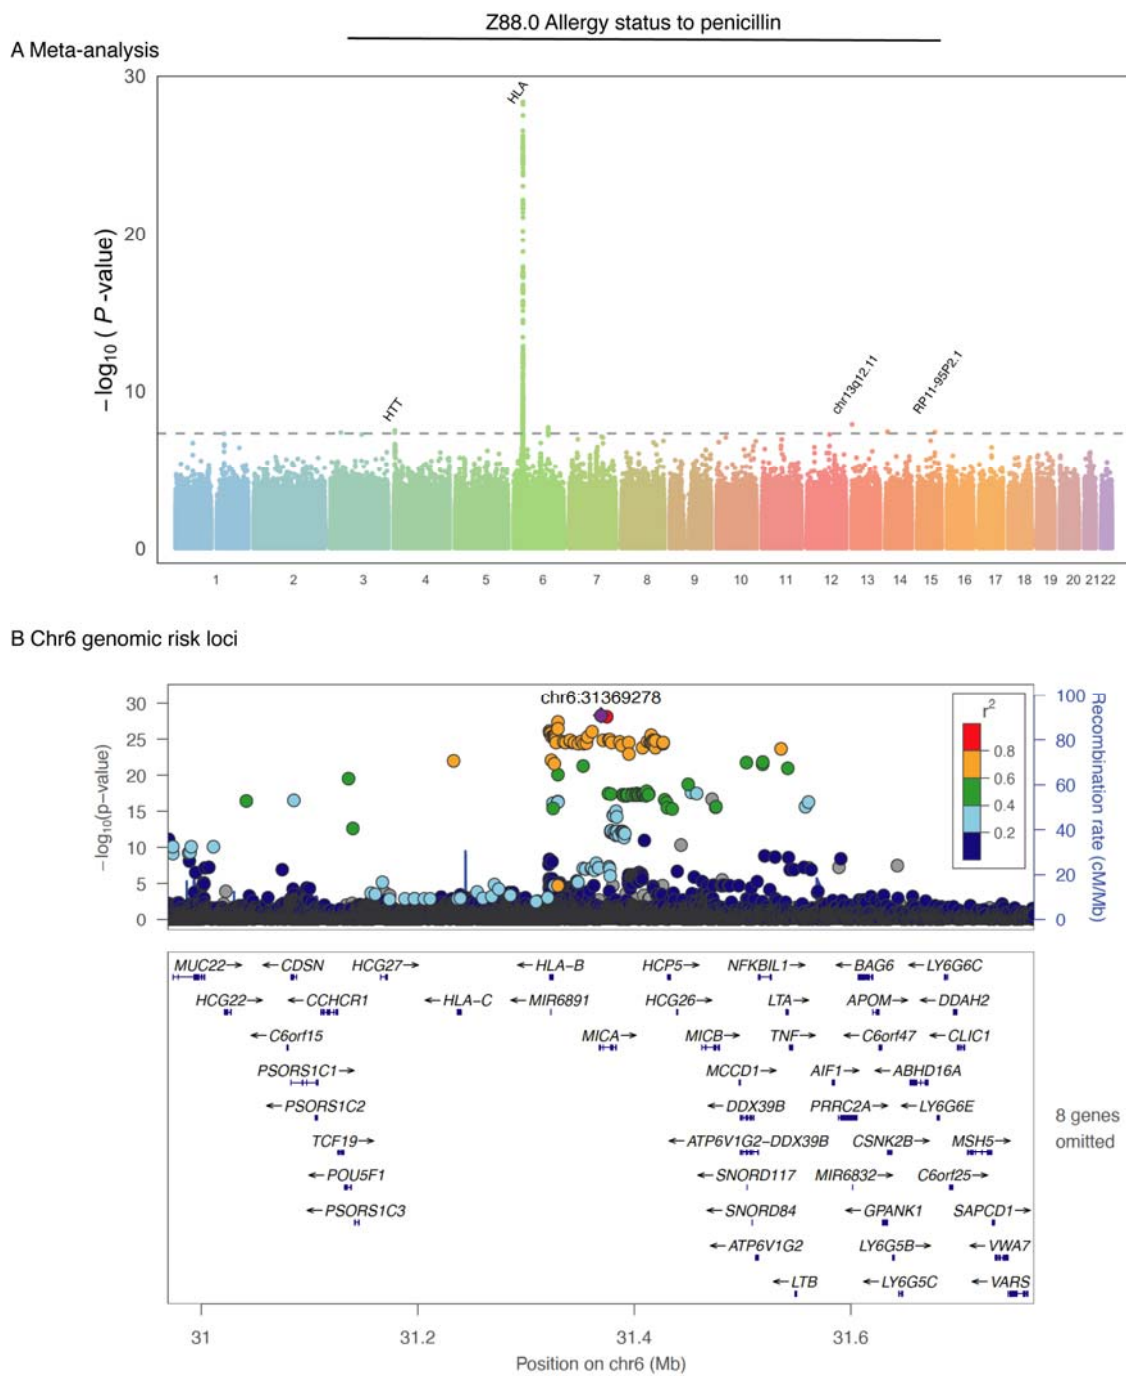

590  
591



592 **Figure 2.**  
593

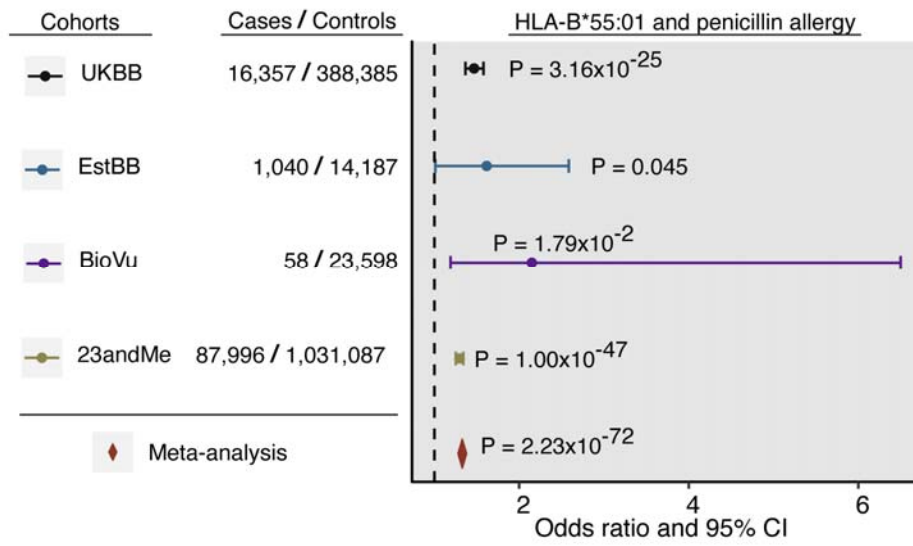

594
